# Supplementary material for: Visible-light-driven photo-enhanced zinc–air batteries using synergistic effect of different types of MnO2 nanostructures
Source: Royal Society of Chemistry journal article supplement (doi:10.1039/d0cy01581d), 2020-01-01
Supplement: d0cy01581d1.pdf [file d0cy01581d1.pdf]

## Supplementary Information

### Visible-Light Driven Photo-enhanced Zinc-Air Batteries using Synergistic Effect of Different Type of MnO<sub>2</sub> Nanostructures

Ankita Mathur<sup>a</sup>, Ravinder Kaushik<sup>b</sup> and Aditi Halder<sup>\*b</sup>

<sup>a</sup> School of Engineering, Indian Institute of Technology Mandi, Mandi, H.P., India

<sup>b</sup> School of Basic Science, Indian Institute of Technology Mandi, Mandi, H.P., India

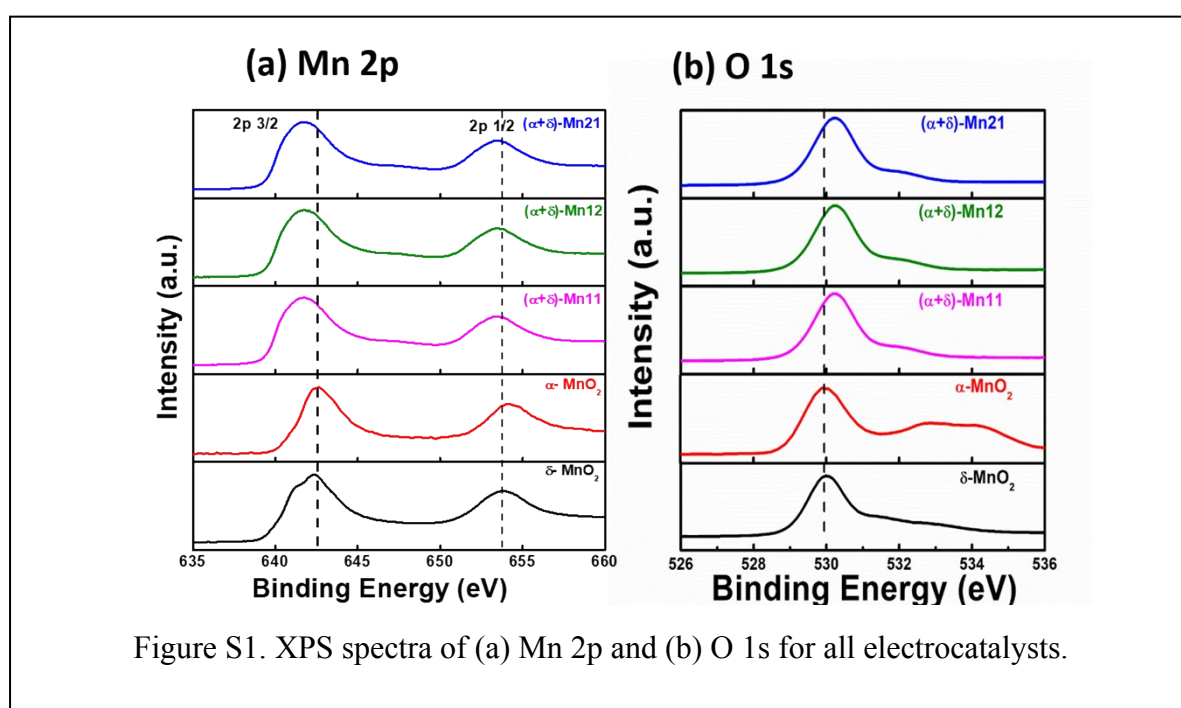

Figure S1. XPS spectra of (a) Mn 2p and (b) O 1s for all electrocatalysts.

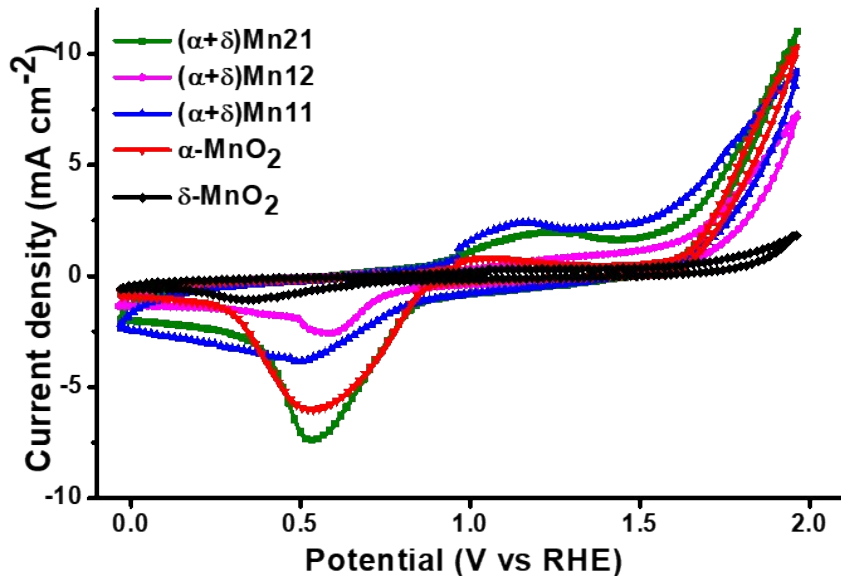

Fig. S2 Cyclic voltammety studies of composite  $(\alpha+\delta)$ - Mn21,  $(\alpha+\delta)$ - Mn12 and  $(\alpha+\delta)$ - Mn11, along with  $\alpha$ - MnO<sub>2</sub> and  $\delta$ - MnO<sub>2</sub> taken in 0.1 M KOH electrolyte in O<sub>2</sub> atmosphere.

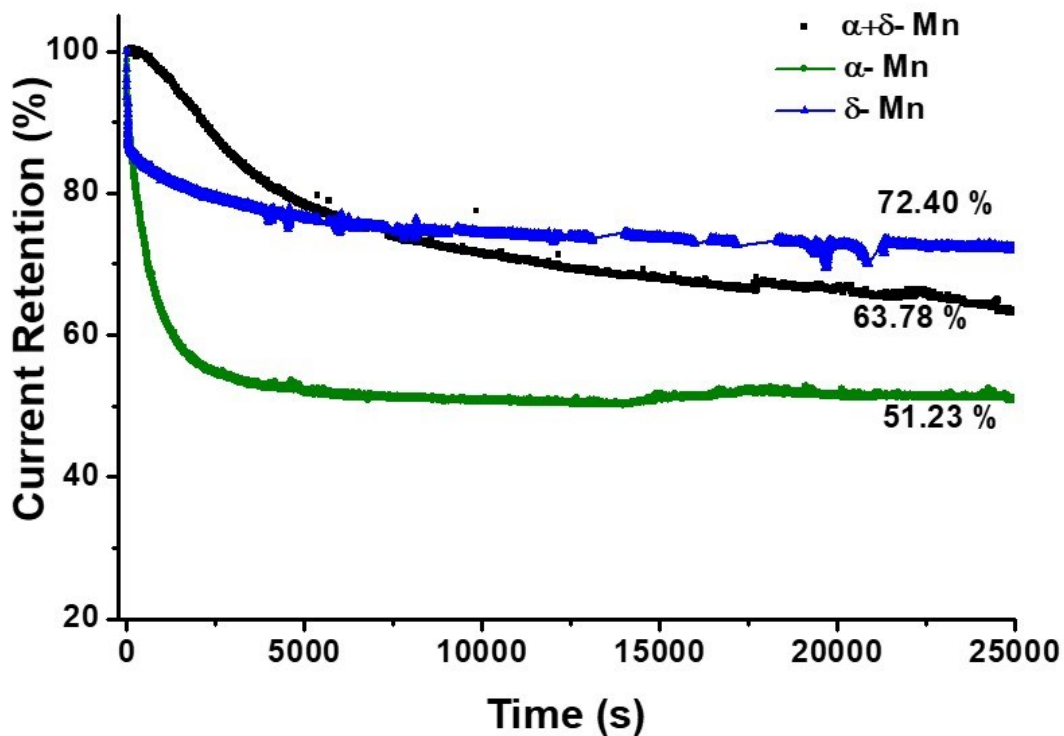

Fig. S3 Chronoamperometric response of  $(\alpha+\delta)$ -Mn11,  $\alpha$  - MnO<sub>2</sub> and  $\delta$ - MnO<sub>2</sub> composite taken at -0.6 V (vs Ag/AgCl) and 600 rpm in O<sub>2</sub> saturated 0.1 M KOH electrolyte solution.

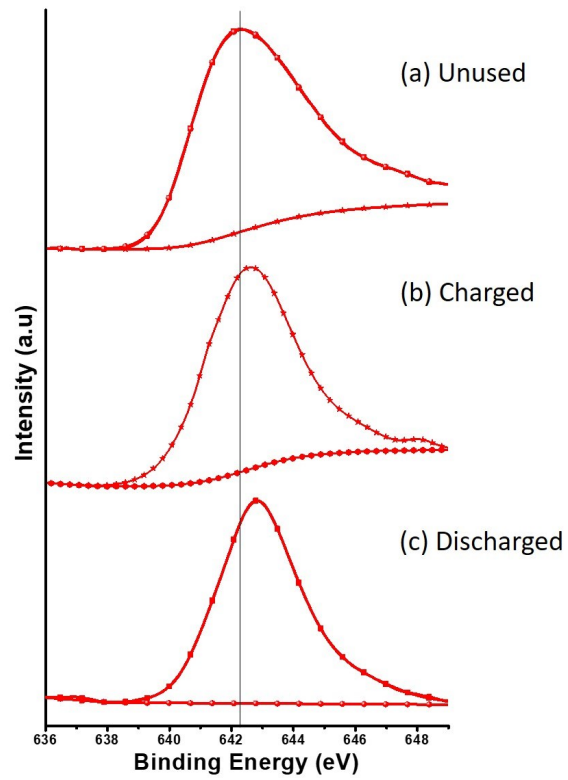

Fig. S4 XPS of Mn 2p for (a) Unused; (b) After charging; and (c) After discharging ( $\alpha+\delta$ )-Mn11 sample, showing a shift in the peak binding energy.

Table 1 showing atomic percentage of Mn in various oxidation states calculated from XPS

|         | Atomic percentage           |                             |                               |                               |                               |
|---------|-----------------------------|-----------------------------|-------------------------------|-------------------------------|-------------------------------|
|         | $\alpha$ - MnO <sub>2</sub> | $\delta$ - MnO <sub>2</sub> | ( $\alpha$ + $\delta$ )- Mn11 | ( $\alpha$ + $\delta$ )- Mn12 | ( $\alpha$ + $\delta$ )- Mn21 |
| Mn (VI) | 28.01                       | 11.15                       | 21.50                         | 14.26                         | 9.96                          |
| Mn(IV)  | 71.99                       | 81.91                       | 53.71                         | 63.68                         | 69.33                         |
| Mn(III) | ---                         | 2.87                        | 6.86                          | 12.23                         | 10.08                         |
| Mn(II)  | ---                         | 1.63                        | 5.33                          | 4.88                          | 5.05                          |

Table 2 showing surface area and pore radius measurement

|                                           | $\alpha$ - MnO <sub>2</sub> | $\delta$ - MnO <sub>2</sub> | ( $\alpha$ + $\delta$ )- MnO <sub>2</sub> |
|-------------------------------------------|-----------------------------|-----------------------------|-------------------------------------------|
| Specific surface area (m <sup>2</sup> /g) | 57.63                       | 171.40                      | 52.03                                     |
| Pore diameter (Å)                         | 38.14                       | 34.02                       | 31.28                                     |

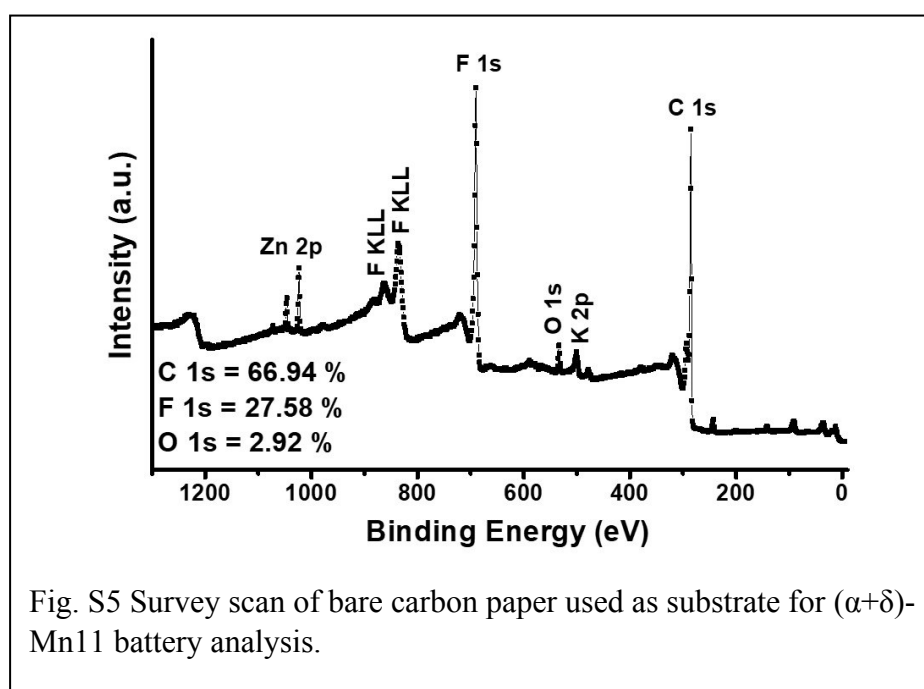

Fig. S5 Survey scan of bare carbon paper used as substrate for ( $\alpha$ + $\delta$ )-Mn11 battery analysis.

Table 3 showing survey of various cathode materials used for Zn-air battery

|                                                   | Specific Capacity<br>at 5 mA cm <sup>-2</sup>          | Power density<br>(mW cm <sup>-2</sup> ) | Reference |
|---------------------------------------------------|--------------------------------------------------------|-----------------------------------------|-----------|
| δ- MnO <sub>2</sub>                               | 169.5 mAh                                              | ---                                     | 1         |
| δ- MnO <sub>2</sub>                               | 160.3 mAh                                              | ---                                     | 1         |
| α- MnO <sub>2</sub>                               | 175.2 mAh                                              | ---                                     | 1         |
| α- MnO <sub>2</sub>                               | 171.5 mAh                                              | ---                                     | 1         |
| Fe doped α-<br>MnO <sub>2</sub>                   | 669.0 mAh g <sup>-1</sup>                              | 30.65                                   | 2         |
| α- MnO <sub>2</sub> /CNT10                        | ---                                                    | 66.30                                   | 3         |
| α- MnO <sub>2</sub> /CNT20                        | ----                                                   | 65.40                                   | 3         |
| α- MnO <sub>2</sub><br>/DWCNT                     | ---                                                    | 61.60                                   | 3         |
| α- MnO <sub>2</sub> /XC72                         | ---                                                    | 61.50                                   | 3         |
| α- MnO <sub>2</sub><br>/SWCNT                     | ---                                                    | 59.50                                   | 3         |
| α- MnO <sub>2</sub> /AC                           | ---                                                    | 57.60                                   | 3         |
| α- MnO <sub>2</sub> /SMGP                         | ---                                                    | 40.50                                   | 3         |
| MnO <sub>2</sub> -IL <sub>0.5</sub>               | 762.0 mAh g <sup>-1</sup>                              | 166.00                                  | 4         |
| CoMn <sub>2</sub> O <sub>4</sub> /rGO             | 460.0 mAh g <sup>-1</sup><br>(20 mA cm <sup>-2</sup> ) | ---                                     | 5         |
| CoMn <sub>2</sub> O <sub>4</sub> /N- rGO          | 610.0 mAh g <sup>-1</sup> (20<br>mA cm <sup>-2</sup> ) | ---                                     | 5         |
| Co <sub>3</sub> O <sub>4</sub> / MnO <sub>2</sub> | ---                                                    | 43.00                                   | 6         |
| Co <sub>3</sub> O <sub>4</sub>                    | ---                                                    | 15.00                                   | 6         |
| MnO <sub>2</sub>                                  | ---                                                    | 32.00                                   | 6         |
| Pt/C                                              | 625 mAh g <sup>-1</sup>                                | 140.00                                  | 7         |
| α- MnO <sub>2</sub>                               | 710.0 mAh g <sup>-1</sup>                              | 6.91                                    | This work |
| δ- MnO <sub>2</sub>                               | 671.0 mAh g <sup>-1</sup>                              | 15.77                                   | This work |
| (α+δ)- MnO <sub>2</sub>                           | 715.0 mAh g <sup>-1</sup>                              | 28.53                                   | This work |

#### Reference:

- 1 Y. Huang, Y. Lin and W. Li, *Electrochim. Acta*, 2013, **99**, 161–165.
- 2 A. Mathur and A. Halder, *Catal. Sci. Technol.*, 2019, **9**, 1245–1254.
- 3 P. C. Li, C. C. Hu, T. H. You and P. Y. Chen, *Carbon N. Y.*, 2017, **111**, 813–821.
- 4 Y. Gu, G. Yan, Y. Lian, P. Qi, Q. Mu, C. Zhang, Z. Deng and Y. Peng, *Energy Storage Mater.*, , DOI:10.1016/j.ensm.2019.05.006.
- 5 M. Prabu, P. Ramakrishnan, H. Nara, T. Momma, T. Osaka and S. Shanmugam, *ACS Appl. Mater. Interfaces*, 2014, **6**, 16545–16555.
- 6 C. Cui, G. Du, K. Zhang, T. An, B. Li, X. Liu and Z. Liu, *J. Alloys Compd.*, 2020, **814**, 152239.

- 7 X. Li, N. Xu, H. Li, M. Wang, L. Zhang and J. Qiao, *Green Energy Environ.*, 2017, **2**, 316–328.
